# Supplementary material
Source: publisher figshare collection journal article supplement (https://karger.figshare.com/ndownloader/files/28842651)
Supplement: Supplementary file 1 [file 28842651]

**Supplemental Table 1.** Univariate and Multivariate Analysis of Acute Kidney Injury Risk Scores as 30-day Mortality Predictors

| **30-day mortality** | **Univariate analysis** | | **Multivariate analysis** | |
| --- | --- | --- | --- | --- |
| **OR** | **P** | **OR** | **P** |
| Contrast material limit score | 1.082 (1.005-1.165) | **0.037** | 0.668 (0.426-1.048) | 0.079 |
| Volume-to-Creatinine Clearance Ratio | 1.072 (1.015-1.132) | **0.012** | 1.432 (1.037-1.977) | **0.029** |
| ACEF | 0.950 (0.563-1.601) | 0.846 | **-** | **-** |
| CR4EATME3AD3 | 1.044 (0.942-1.157) | 0.413 | **-** | **-** |
| Mehran model A | 1.034 (0.954-1.120) | 0.421 | **-** | **-** |
| Mehran model B | 1.078 (0.997-1.166) | 0.059 | **-** | **-** |
